# Supplementary material
Source: MDPI journal article supplement (https://www.mdpi.com/2227-7102/11/9/536)
Supplement: s1 [file s1]

# **Implementation of a surgery congress for medical students to learn transversal competences. A case of student-led teaching activity**

**Table S1.** Rubric for the evaluation of transversal competencies. Adapted from "Institutional Project of Transversal Competences - UPV"

| Competence                         | Descriptors                                                                    | Descriptor                                                                                                   |                                                                                                                |                                                                                                                         |                                                                                                      |
|------------------------------------|--------------------------------------------------------------------------------|--------------------------------------------------------------------------------------------------------------|----------------------------------------------------------------------------------------------------------------|-------------------------------------------------------------------------------------------------------------------------|------------------------------------------------------------------------------------------------------|
|                                    |                                                                                | 1 (Not or Poorly reached)                                                                                    | 2 (Adequate)                                                                                                   | 3 (Good)                                                                                                                | 4 (Excellent)                                                                                        |
| a) ANALYSIS AND PROBLEM RESOLUTION | 1. Identifies the specific objectives by following the instructions.           | Does not identify objectives.                                                                                | Identifies some objectives but does not identify potential obstacles to their achievement.                     | Identifies all objectives and identifies some obstacles to their achievement.                                           | Identify all objectives as well as obstacles by following instructions.                              |
|                                    | 2. Proposes solutions and/or concrete actions after analysis of the situation. | Does not propose concrete solutions and/or actions (gets lost in digressions, ambiguities, etc.)             | Proposes some concrete solution and/or action, although erroneous (does not fit the objectives)                | Proposes some concrete solution and/or action adequate to the objectives.                                               | Argues coherently the solutions and/or actions adopted.                                              |
|                                    | 3. Evaluate the proposed solutions.                                            | Does not evaluate the proposed solutions. Evaluates solutions in a superficial way, without arguing reasons. | Evaluates solutions superficially, with limited reasoning.                                                     | Evaluates solutions superficially, with a correct argumentation, but without discussion with the rest of the teammates. | Evaluate the solutions with an optimal or satisfactory level of detail, as discussed in the subject. |
| b) TEAMWORK AND LEADERSHIP         | 4. Ability to make decisions responsibly.                                      | The speech does not evidence initiative.                                                                     | The decisions taken are presented but not argued.                                                              | The decisions taken are presented and argued.                                                                           | All decisions made for the development of the work are presented, argued and supported.              |
|                                    | 5. Autonomy and working capacity.                                              | Need for continuous supervision, providing a work of minimums.                                               | Little monitoring is required. The work is presented with the minimum requested but without any novel element. | A work with novel and creative elements is presented, in accordance to the guidelines offered.                          | A work with novel and creative elements is presented. No supervision required.                       |
|                                    | 6. Prepares properly when he/she has to meet.                                  | Attends the meetings without having carried out the tasks assigned.                                          | Attends meetings with limited work done or poor preparation.                                                   | Complies with prior individual preparation.                                                                             | Prepares the meeting in a meritorious manner.                                                        |

|                  |                                                           |                                                                                                                 |                                                                             |                                                                                            |                                                                                                                                         |
|------------------|-----------------------------------------------------------|-----------------------------------------------------------------------------------------------------------------|-----------------------------------------------------------------------------|--------------------------------------------------------------------------------------------|-----------------------------------------------------------------------------------------------------------------------------------------|
| c) COMMUNICATION | 7. Attends and actively participates in team meetings.    | Does not attend meetings or attends with a negative attitude.                                                   | Attends meetings.                                                           | Attends meetings with an active and participative listening attitude.                      | Actively participates in meetings and encourages the participation of other team members participation of the rest of the team members. |
|                  | 8. Personal disposition towards communication.            | Does not intervene even when questioned or does so lacking the basic rules of education and social interaction. | Intervenes only when questioned and/or shows inappropriate attitudes.       | Intervenes voluntarily and shows signs of active listening.                                | Usually participates with initiative and opportunity.                                                                                   |
|                  | 9. The presentations are structured in a coherent manner. | The presentation shows a lack of order and/or hierarchy in the presentation of ideas.                           | The structure of the presentation does not facilitate understanding.        | The presentations are structured in a coherent way, which facilitates their understanding. | The presentation is organized, complete and effective.                                                                                  |
|                  | 10. Coherent and cohesive speech.                         | Presents a discourse that is confusing and/or difficult to understand.                                          | Presents a speech that is understood but is disorganized and/or incomplete. | Present a coherent and cohesive speech.                                                    | Presents a coherent and cohesive discourse that is also structured in a personal way.                                                   |

## d) ANALYTICAL THINKING

|                                                                                                               |                                                                                                                                                             |                                                                                                                                                                              |                                                                                                                                            |                                                                                                              |
|---------------------------------------------------------------------------------------------------------------|-------------------------------------------------------------------------------------------------------------------------------------------------------------|------------------------------------------------------------------------------------------------------------------------------------------------------------------------------|--------------------------------------------------------------------------------------------------------------------------------------------|--------------------------------------------------------------------------------------------------------------|
| 11. Critical attitude towards reality: he/she wonders why things happen.                                      | Does not show any kind of critical spirit: never questions the situation or the reality in which he lives. Assumes as true any information he/she receives. | He/she questions certain situations of the reality in which he lives. But is incapable of making his own judgments and evaluations. Needs the help of others to get answers. | Wonders why things happen and investigates to get answers autonomously. But is influenced in making his/her own judgments and evaluations. | Reflects and investigates the why of things, and is able to find answers and argue them objectively.         |
| 12. Differentiates facts from opinions, interpretations or evaluations.                                       | Demonstrates an unreflective attitude towards other people's speech.                                                                                        | Does not distinguish facts from opinions. Usually distinguishes facts from opinions, but may accept judgments or decisions based on opinions.                                | Differentiates facts from opinions, interpretations or assessments in the arguments of others.                                             | Questions judgments or decisions based on opinions, assessments, etc. and detects fallacies and ambiguities. |
| 13. Express their own judgments and opinions own judgments and opinions based on internal criteria objective. | Shows a passive attitude and does not express his/her own opinions.                                                                                         | Expresses his/her opinion, but is not able to argue it.                                                                                                                      | Expresses his/her opinion and argues it on the basis of objective internal criteria.                                                       | Expresses and argues objectively his/her opinion, being also able to refute other different points of view.  |

|                                 |                                                                                                 |                                                                |                                                                                                                      |                                                                                                                         |                                                                                     |
|---------------------------------|-------------------------------------------------------------------------------------------------|----------------------------------------------------------------|----------------------------------------------------------------------------------------------------------------------|-------------------------------------------------------------------------------------------------------------------------|-------------------------------------------------------------------------------------|
| e) PLANNING AND TIME MANAGEMENT | 14. Assigns time to activities and performs them in the required format.                        | Does not assign time to activities and does not complete them. | Assigns inadequate time to the activities, so only performs some of them.                                            | Assigns adequate time and performs the activities with the minimum required format.                                     | Assigns adequate time to the activities and performs them with an excellent format. |
|                                 | 15. Analyzes the execution of the activities.                                                   | No analysis is performed.                                      | Performs a superficial analysis of the activities with a partial readjustment (of timing, sequencing, activities...) | Performs an adequate analysis of most of the activities with a correct readjustment (timing, sequencing, activities...) | Analyzes in depth the totality of the activities and proposes improvements.         |
|                                 | 16. Evaluates the planning and results achieved individual and/or group results of the project. | Does not carry out any evaluation.                             | Performs a superficial evaluation of the activities with partial readjustments (of times, sequencing, activities...) | Performs an evaluation of the activities with a correct readjustment (of times, sequencing, activities...)              | Evaluates in depth the planning of activities and proposes improvements.            |
